# Supplementary material for: Coupling of nanocrystal hexagonal array and two-dimensional metastable substrate boosts H2-production
Source: PubMed Central journal article supplement (PMC9530234; doi:10.1038/s41467-022-33512-5), 2022-10-03
Supplement: 41467_2022_33512_MOESM1_ESM.pdf [file 41467_2022_33512_MOESM1_ESM.pdf]

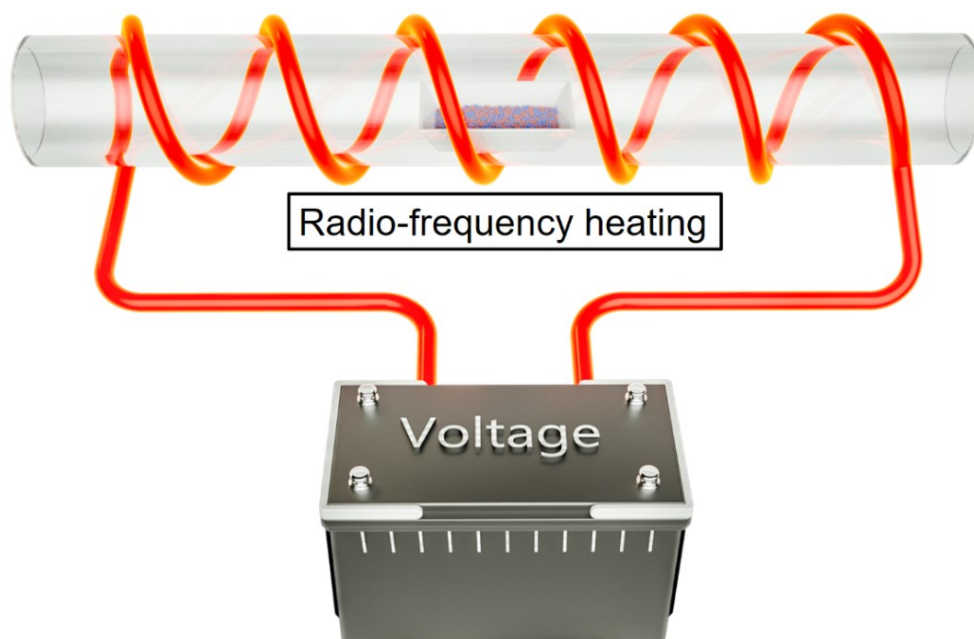

1  
2  
3  
4  
5

**Supplementary Figure 1. Schematic representation of radio-frequency assisted molten-alkali method.** The rhodium (III) chloride ( $\text{RhCl}_3$ ) and potassium hydroxide ( $\text{KOH}$ ) were selected as the raw materials and uniformly mixed in crucible. This figure was made with the Cinema 4D Software.

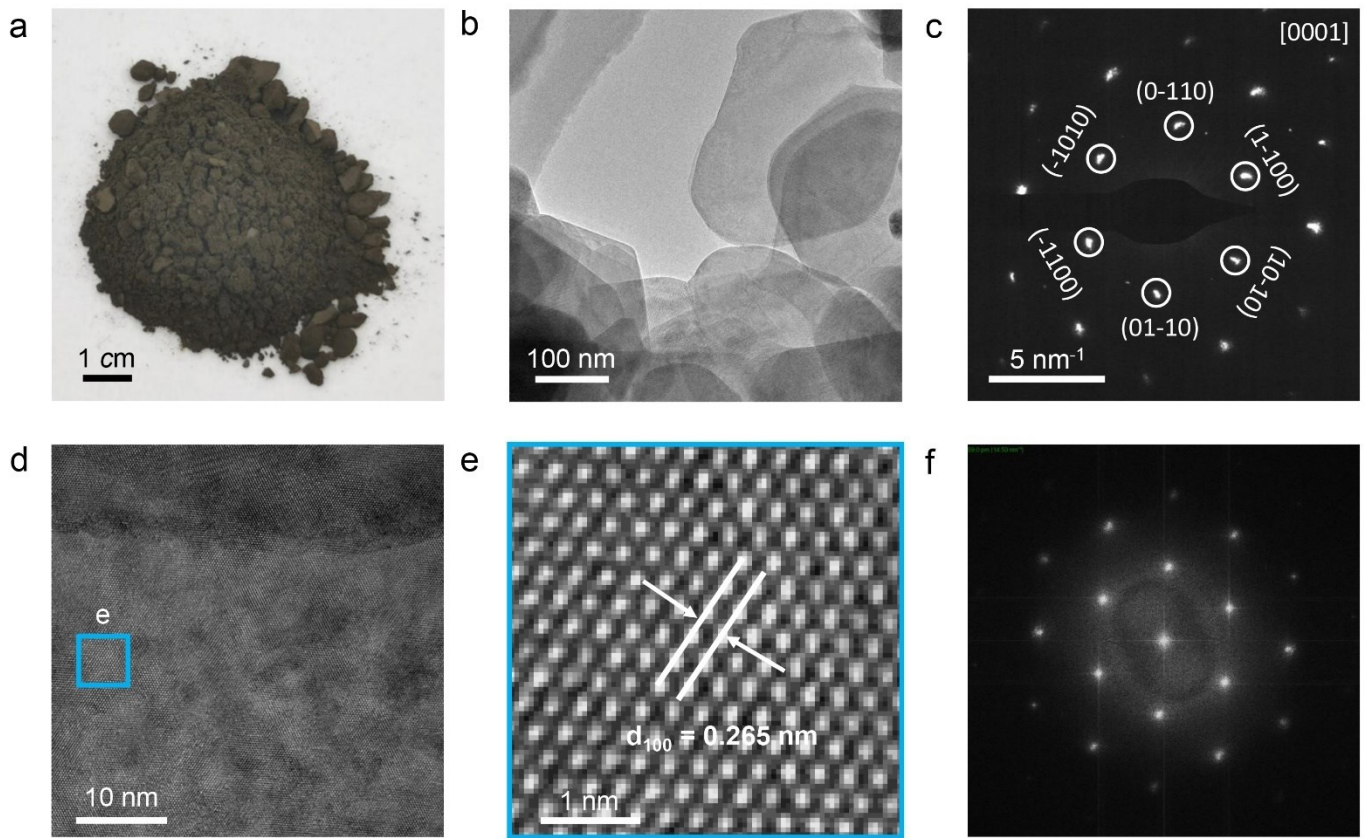

1

2 **Supplementary Figure 2. Digital image, SEM, SAED, HRTEM and FFT images of P-Tri-RhO<sub>2</sub>.** (a)  
 3 The digital image of P-Tri-RhO<sub>2</sub> powder. (b) TEM image and (c) SAED pattern of P-Tri-RhO<sub>2</sub>. (d)  
 4 HRTEM image and (e) its partially enlarged view. (f) The fast Fourier transform (FFT) from (e).

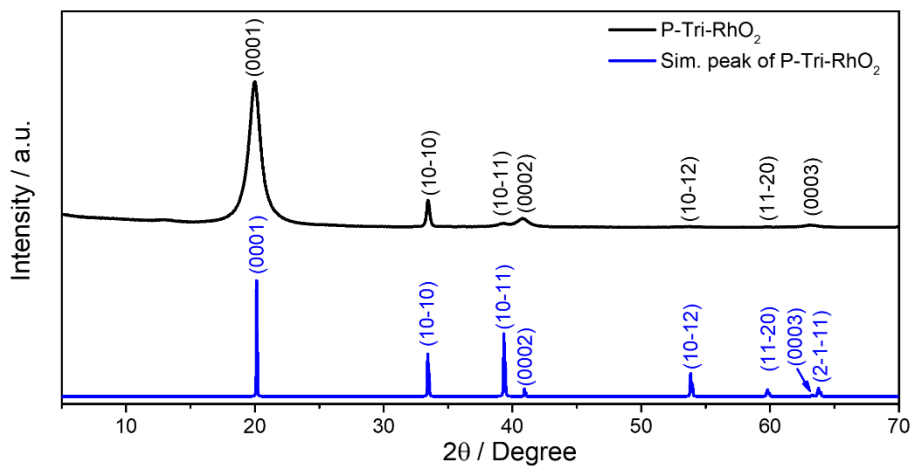

1

2 **Supplementary Figure 3. Comparison of XRD pattern and simulated XRD pattern for P-Tri-RhO<sub>2</sub>.**  
 3 Comparison of XRD patterns of P-Tri-RhO<sub>2</sub> (black curve) and simulated X-ray diffraction peak of  
 4 P-Tri-RhO<sub>2</sub> (red curve).  
 5

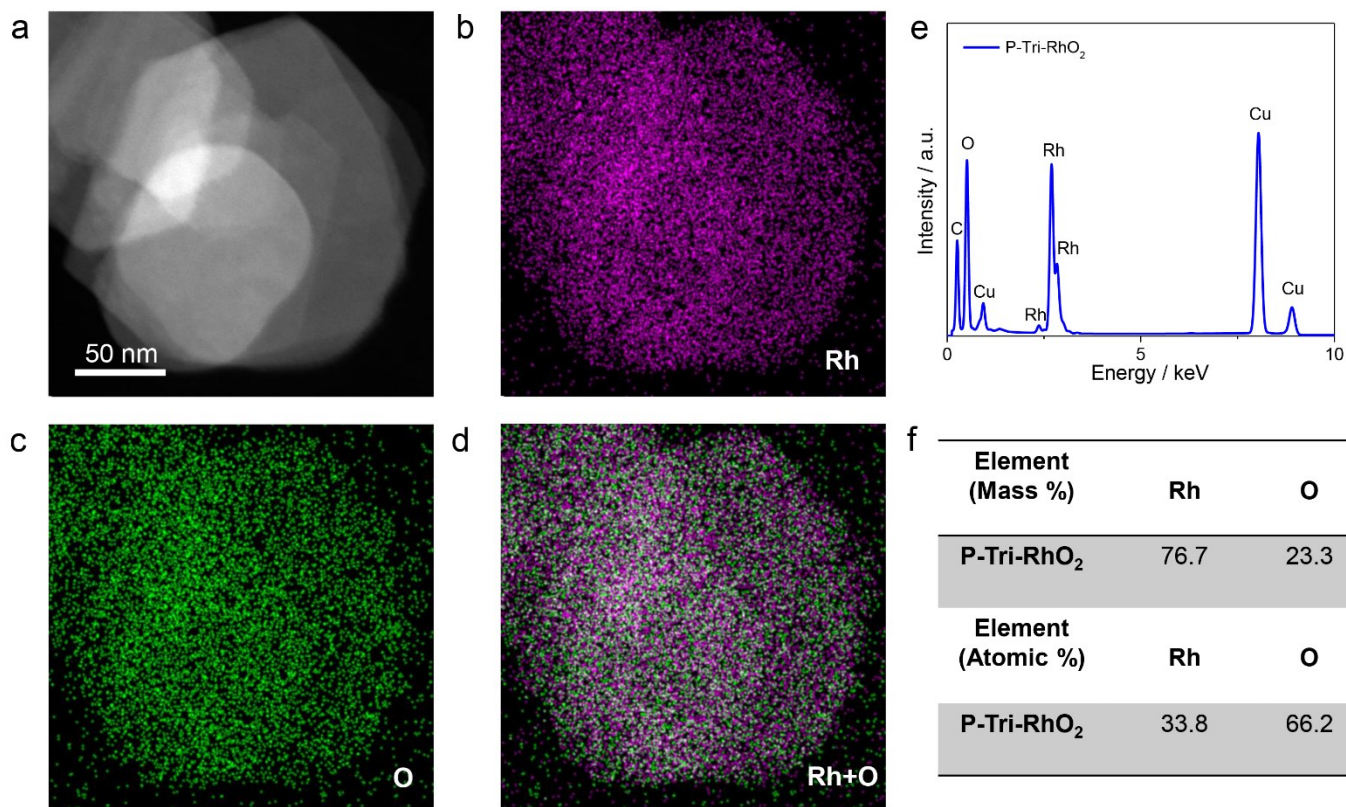

1

2 **Supplementary Figure 4. EDX and elemental analysis of P-Tri-RhO<sub>2</sub>.** (a-d) EDX-mapping images of  
 3 P-Tri-RhO<sub>2</sub>, where Rh and O are uniformly distributed in the nanosheet structure. (e) EDX analysis of  
 4 P-Tri-RhO<sub>2</sub>. (f) The table of the mass and atomic ratios of Rh to O in P-Tri-RhO<sub>2</sub> by elemental analysis  
 5 method (elementar EL III).

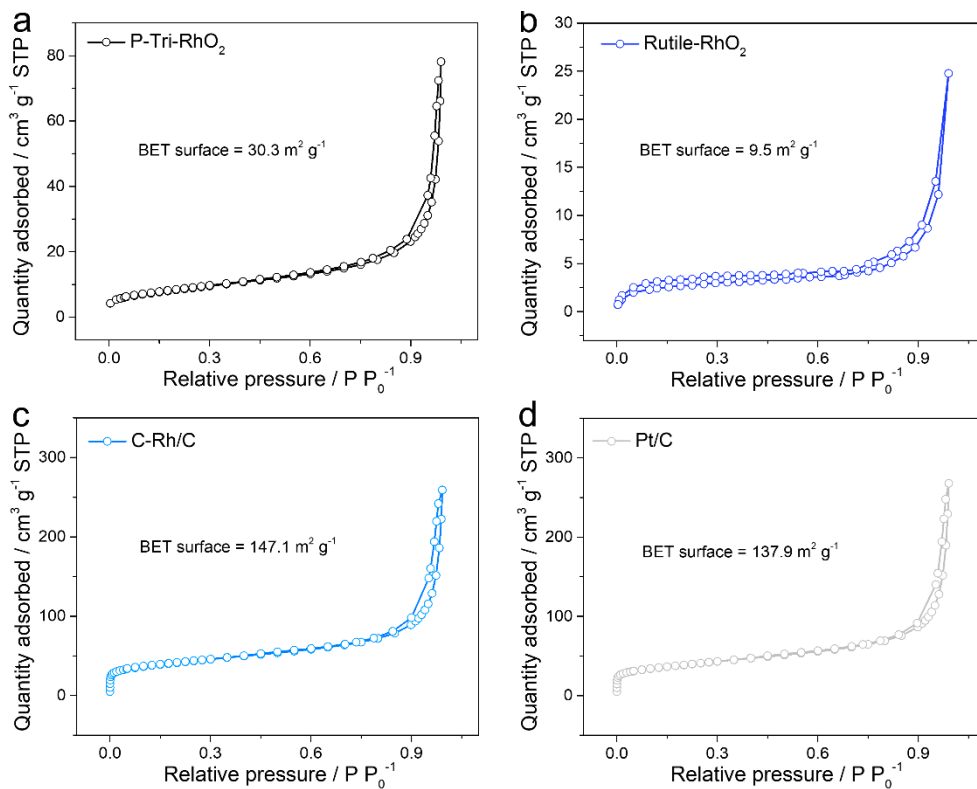

1

2

3

**Supplementary Figure 5. BET surface area measurements for different catalysts.** BET surface area measurements for (a) P-Tri-RhO<sub>2</sub>, (b) Rutile-RhO<sub>2</sub>, (c) C-Rh/C and (d) Pt/C.

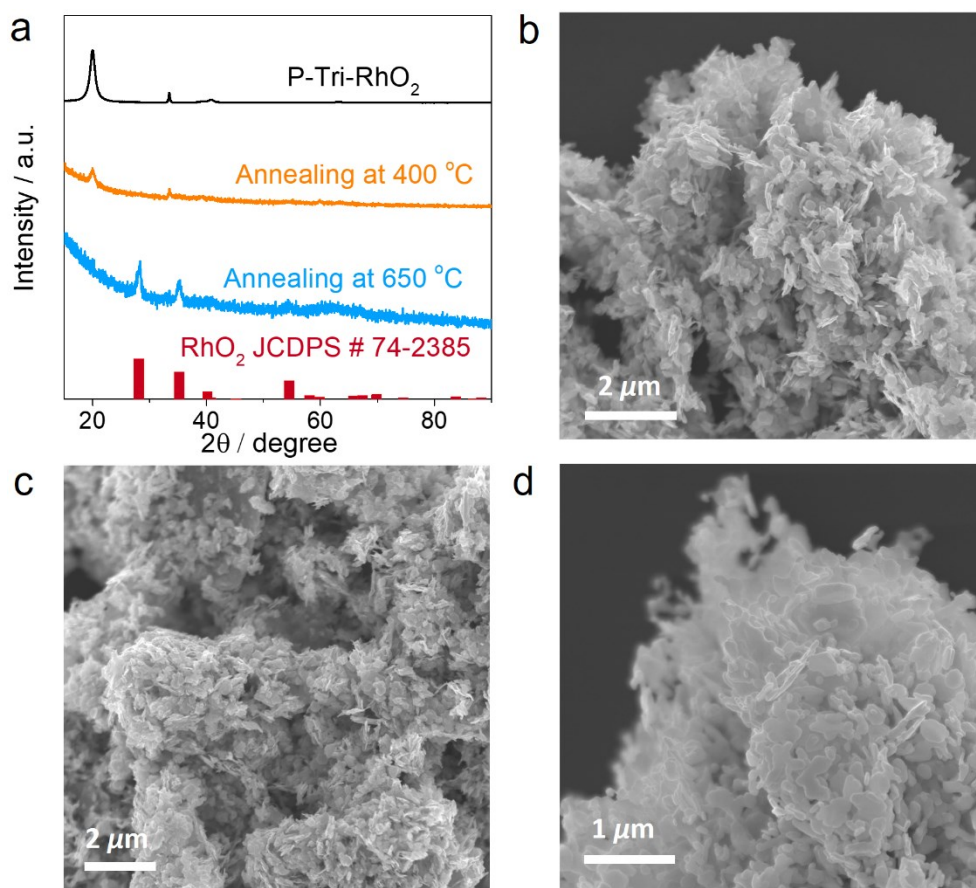

1

2 **Supplementary Figure 6. XRD patterns and SEM images obtained by annealing P-Tri-RhO<sub>2</sub> at**  
3 **different temperatures.** (a) Temperature-dependent XRD patterns of annealing P-Tri-RhO<sub>2</sub> at different  
4 temperatures. The corresponding SEM images of (b) P-Tri-RhO<sub>2</sub> and the products by annealing  
5 P-Tri-RhO<sub>2</sub> at (c) 400 °C and (d) 650 °C.

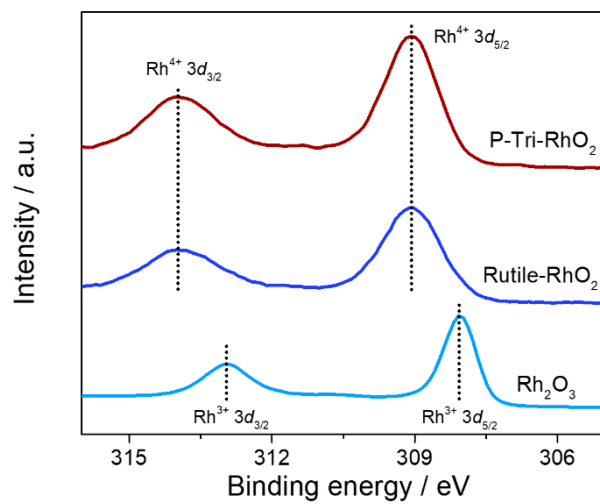

1  
2 **Supplementary Figure 7. XPS measurements for different samples.** XPS spectra of Rh 3d peaks for  
3 P-Tri-RhO<sub>2</sub>, Rutile-RhO<sub>2</sub> and Rh<sub>2</sub>O<sub>3</sub>.



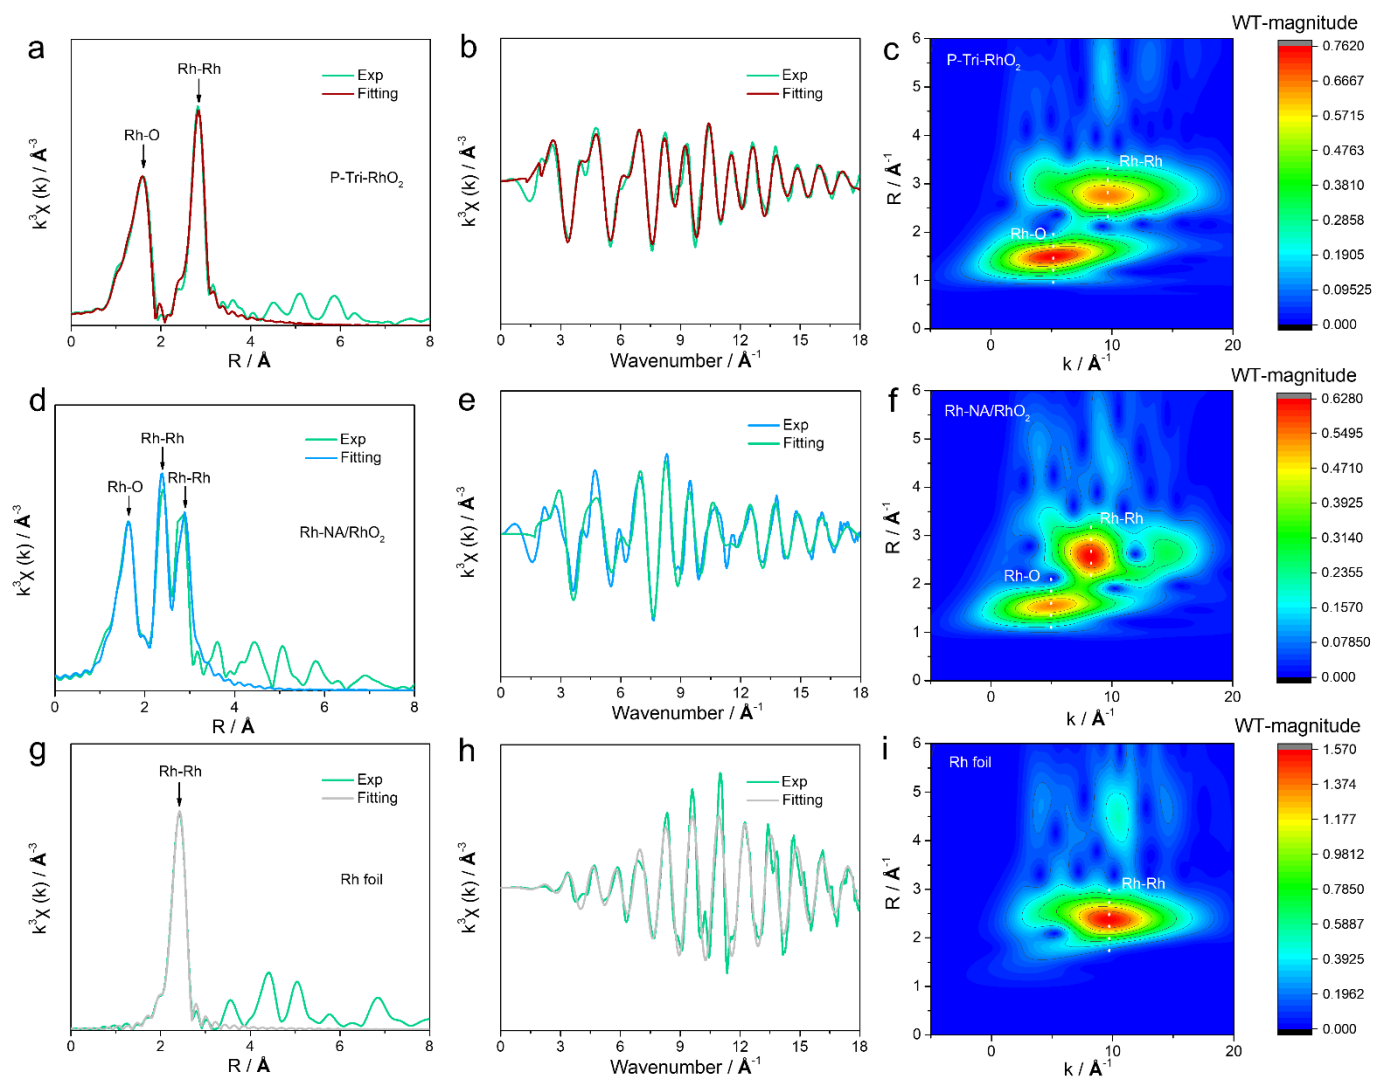

1

2

3

4

5

**Supplementary Figure 8. EXAFS fitting curves and wavelet transforms for P-Tri-RhO<sub>2</sub>, Rh-NA/RhO<sub>2</sub> and Rh foil.** (a), (d), (g) EXAFS fitting curves of P-Tri-RhO<sub>2</sub>, Rh-NA/RhO<sub>2</sub> and Rh foil at *R* space. (b), (e), (h) EXAFS fitting curves of P-Tri-RhO<sub>2</sub>, Rh-NA/RhO<sub>2</sub> and Rh foil at *q* space. (c), (f), (i) Wavelet transforms of Rh K-edge EXAFS for P-Tri-RhO<sub>2</sub>, Rh-NA/RhO<sub>2</sub> and Rh foil.



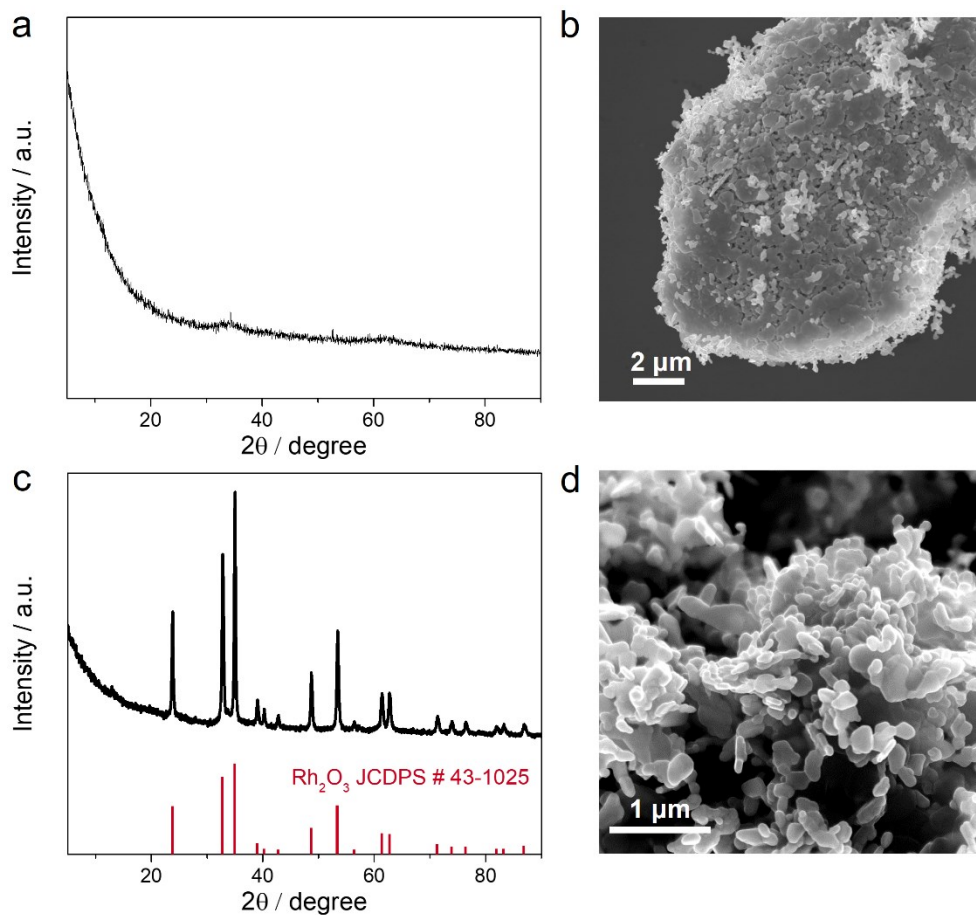

1  
 2 **Supplementary Figure 9. XRD patterns and SEM images obtained by changing the synthetic**  
 3 **parameters. (a) XRD pattern and (b) SEM image of the product obtained by directly mixing  $\text{RhCl}_3$  and**  
 4 **KOH. (c) XRD pattern and (d) SEM image of the product obtained by directly radio-frequency heating**  
 5  **$\text{RhCl}_3$  without adding KOH.**

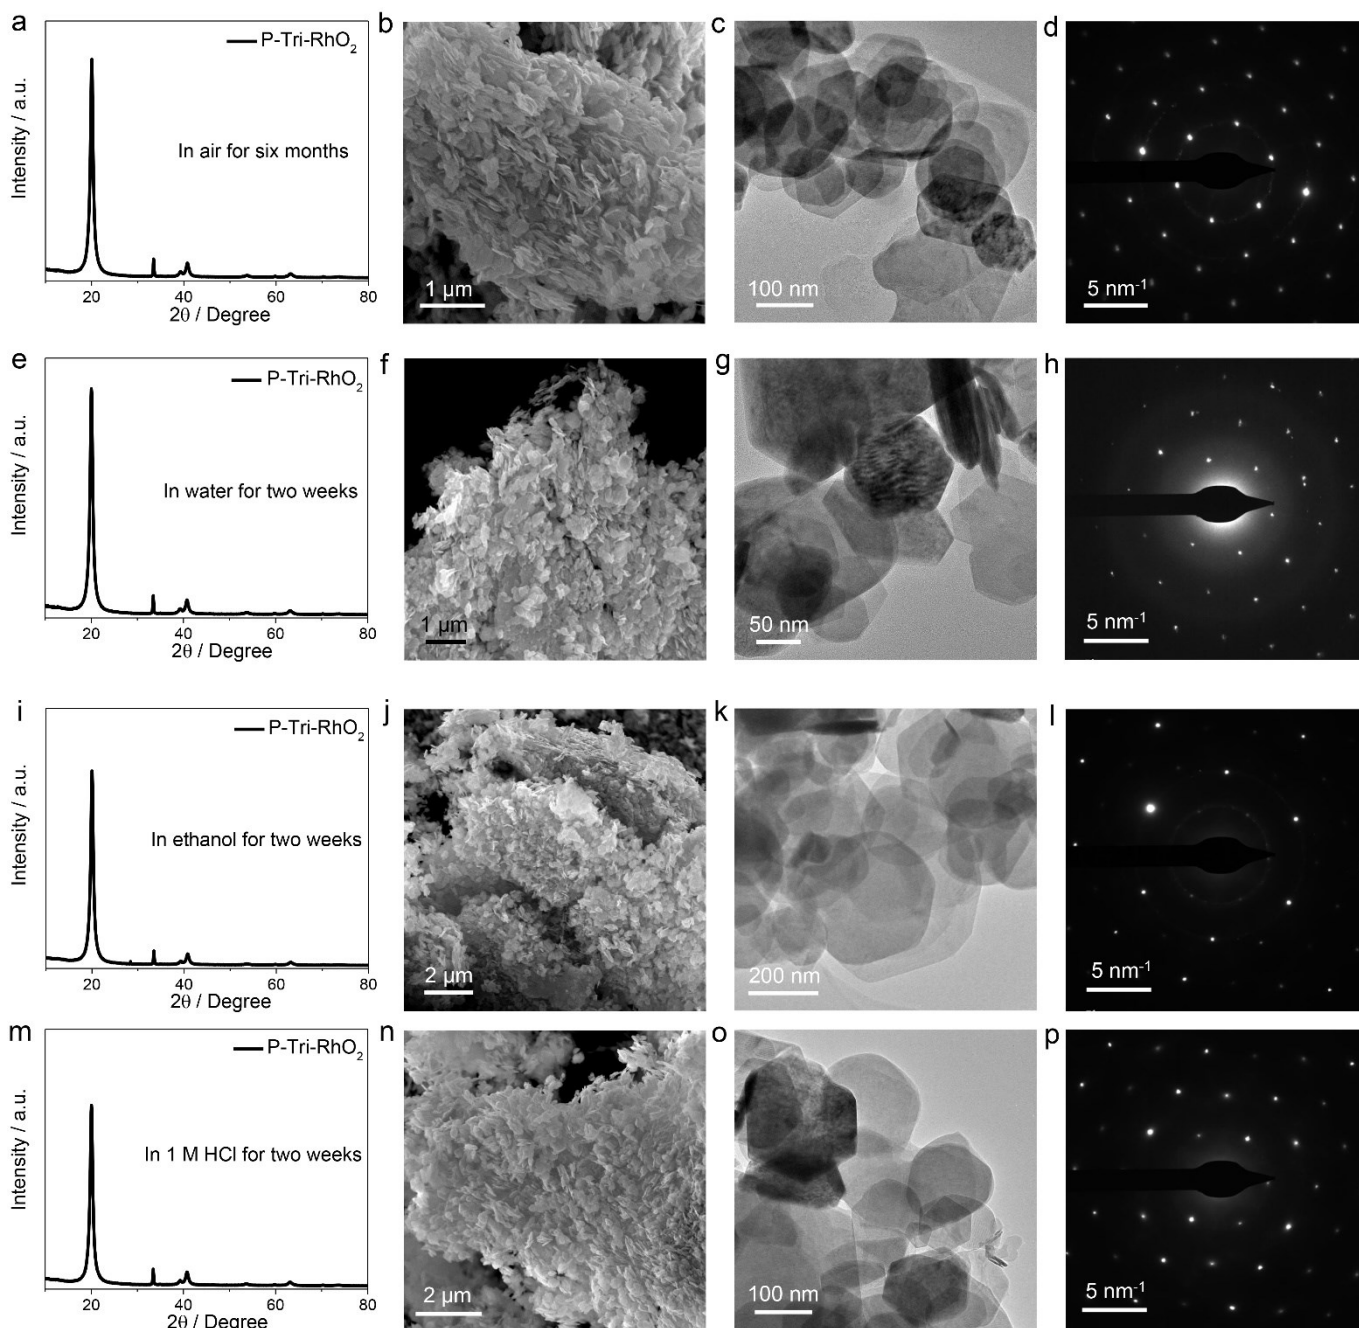

1

2 **Supplementary Figure 10. The chemical stability for P-Tri-RhO<sub>2</sub>.** (a-d) The XRD pattern, SEM, TEM  
 3 images and SAED pattern of P-Tri-RhO<sub>2</sub> after placing it in air for six months. (e-h) The XRD pattern,  
 4 SEM, TEM images and SAED pattern of P-Tri-RhO<sub>2</sub> after soaking it in water for two weeks. (i-l) The  
 5 XRD pattern, SEM, TEM images and SAED pattern of P-Tri-RhO<sub>2</sub> after soaking it in ethanol for two  
 6 weeks. (m-p) The XRD pattern, SEM, TEM images and SAED pattern of P-Tri-RhO<sub>2</sub> after soaking it in 1  
 7 M hydrochloric acid solution for two weeks.

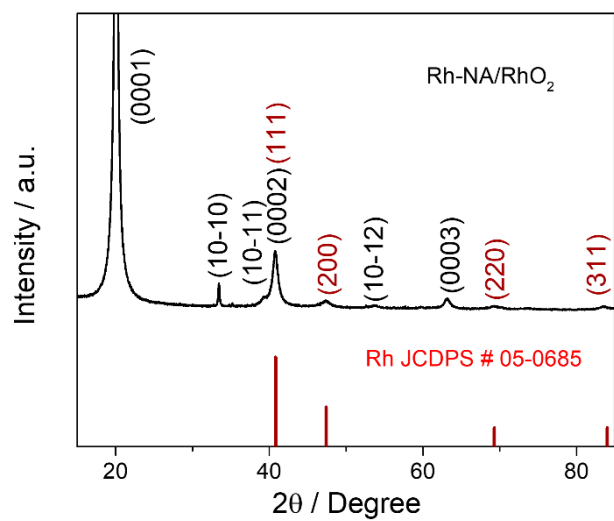

1

2 **Supplementary Figure 11. XRD pattern of Rh-NA/RhO<sub>2</sub>.** The peaks of (111), (200), (220) and (311)  
3 planes of face-centered cubic Rh was detected and marked in red.

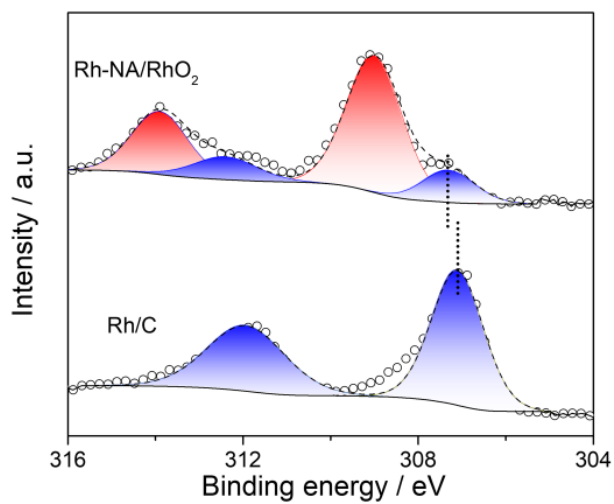

1  
2 **Supplementary Figure 12. XPS measurements for Rh-NA/RhO<sub>2</sub> and Rh/C. XPS spectra of Rh 3d**  
3 **peaks for Rh-NA/RhO<sub>2</sub> and Rh/C.**

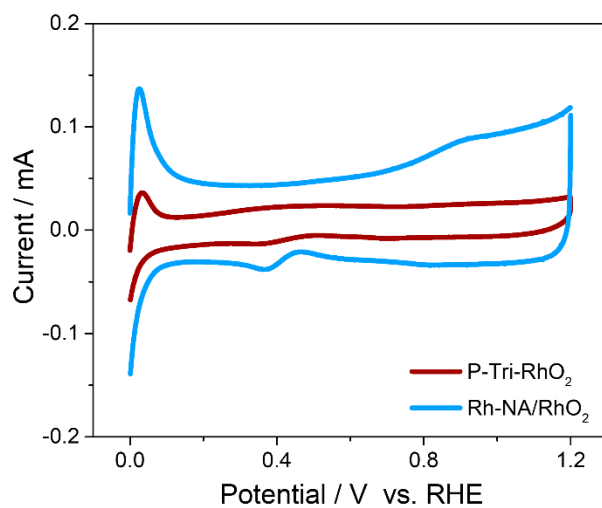

1

2 **Supplementary Figure 13. Cyclic voltammetry (CV) tests for P-Tri-RhO<sub>2</sub> and Rh-NA/RhO<sub>2</sub>. CV**  
3 **curves of P-Tri-RhO<sub>2</sub> and Rh-NA/RhO<sub>2</sub> in H<sub>2</sub>-saturated 0.5 M H<sub>2</sub>SO<sub>4</sub>.**

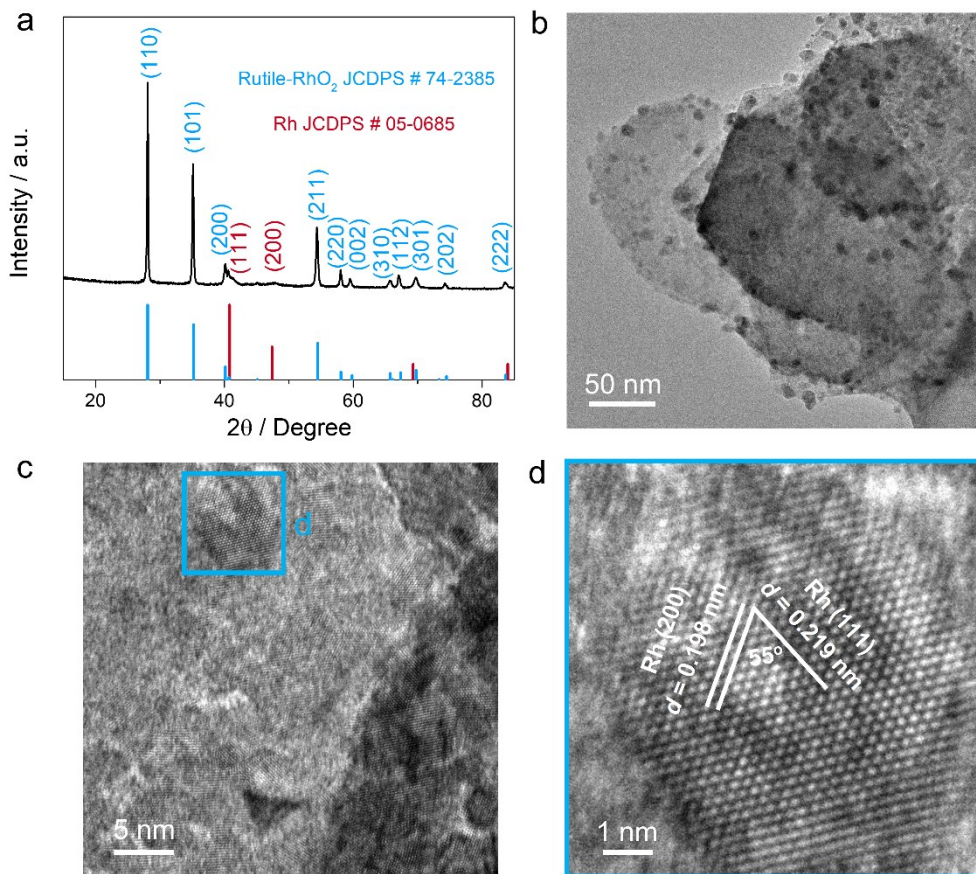

1  
 2 **Supplementary Figure 14. XRD pattern, TEM and HRTEM images of the product obtained by**  
 3 ***in-situ* electroreduction of Rutile-RhO<sub>2</sub>.** (a) XRD pattern of the product obtained by *in-situ*  
 4 electroreduction of Rutile-RhO<sub>2</sub>. (b-d) TEM and HRTEM images of the product obtained by *in-situ*  
 5 electroreduction of Rutile-RhO<sub>2</sub>.

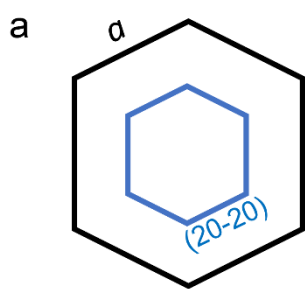

P-Tri-RhO<sub>2</sub> : Trigonal system  
 $a = 0.3091 \text{ nm}$   
 $d\text{-spacing (20-20)} : 0.1339 \text{ nm}$

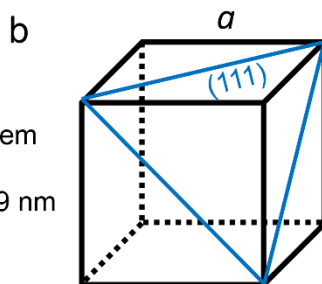

Rh : Cubic system  
 $a = 0.3803 \text{ nm}$   
 $d\text{-spacing (220)} : 0.1345 \text{ nm}$

1

2 **Supplementary Figure 15. Schematic views of crystal matching of Rh-NA/RhO<sub>2</sub> system. (a)** The  
 3 crystal structure information of P-Tri-RhO<sub>2</sub>. **(b)** The crystal structure information of face-centered cubic  
 4 Rh.



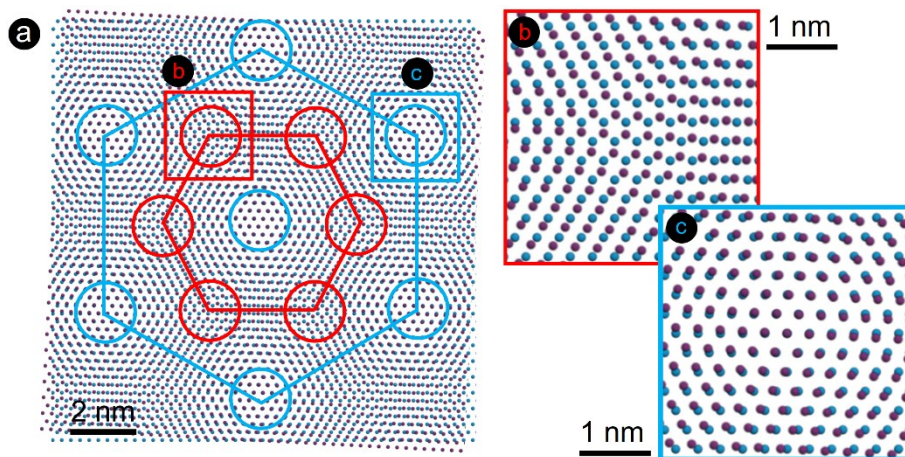

1  
2  
3  
4  
5  
6

**Supplementary Figure 16. Schematic views of Moire pattern obtained by twisting bilayer P-Tri-RhO<sub>2</sub> region with the rotation angle of 3°.** (a) Simulated Moire pattern was obtained by twisting bilayer P-Tri-RhO<sub>2</sub> region with the rotation angle of 3°. The Rh atoms on different layers are marked with red and blue colors, respectively. (b, c) The enlarged areas from (a).

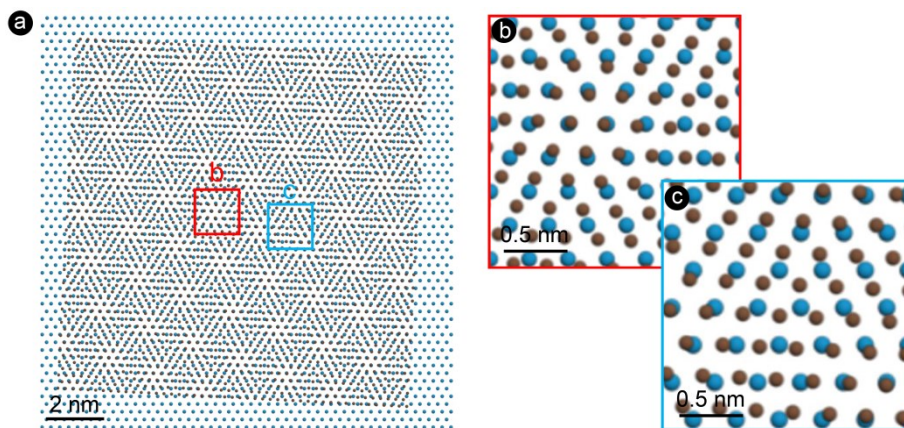

1  
2  
3  
4  
5  
6

**Supplementary Figure 17. Schematic views of Moire pattern obtained by twisting one single-layer P-Tri-RhO<sub>2</sub> and one single-layer metallic Rh with the rotation angle of 3°. Simulated Moire pattern was obtained by twisting one single-layer P-Tri-RhO<sub>2</sub> and one single-layer metallic Rh with the rotation angle of 3°. (b, c) The enlarged areas from (a).**

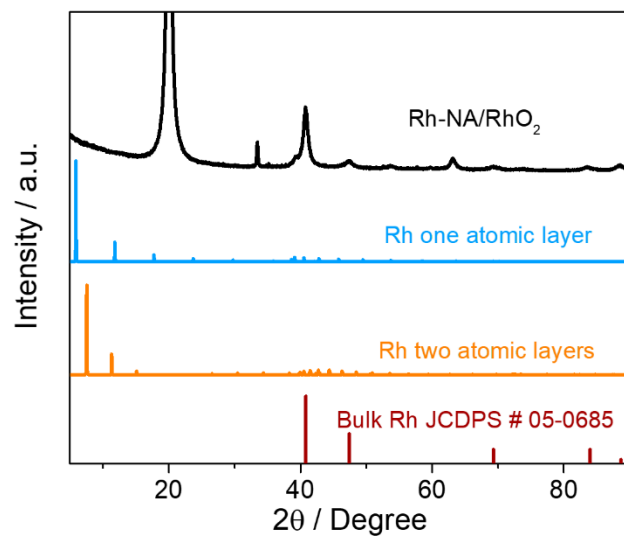

1  
2 **Supplementary Figure 18. Comparison of XRD patterns for Rh-NA/RhO<sub>2</sub> and different layers Rh.**  
3 The XRD pattern of Rh-NA/RhO<sub>2</sub> and the simulated XRD patterns of different layers Rh.

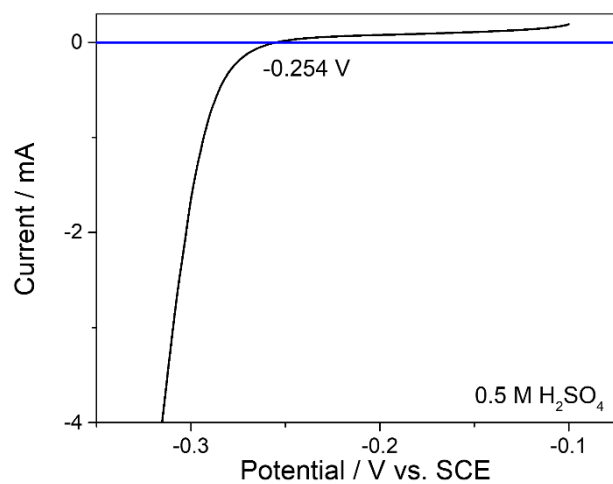

1

2 **Supplementary Figure 19. Calibration of the saturated calomel electrode (SCE).** Calibration of the  
3 SCE electrode with respect to reversible hydrogen electrode (RHE) in 0.5 M H<sub>2</sub>SO<sub>4</sub> electrolyte bubbled  
4 with pure hydrogen gas at room temperature. Scan rate: 5 mV s<sup>-1</sup>. Two Pt electrodes were used as the  
5 working and counter electrodes to calibrate the SCE.

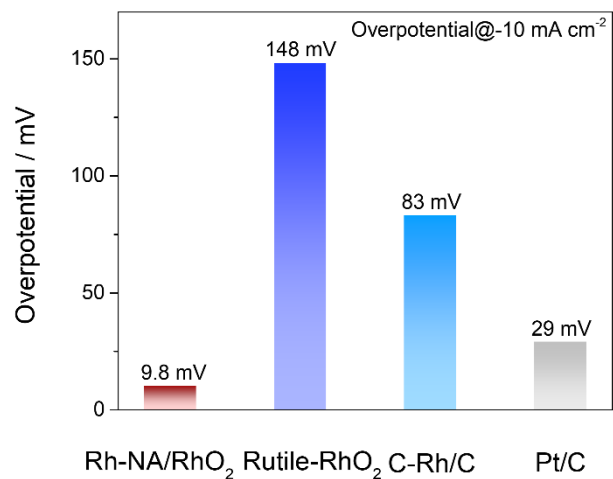

1

2

3

4

**Supplementary Figure 20. Comparison of overpotentials for different catalysts.** The overpotentials at the current density of  $-10 \text{ mA cm}^{-2}$  for Rh-NA/RhO<sub>2</sub>, Rutile-RhO<sub>2</sub>, C-Rh/C and Pt/C.

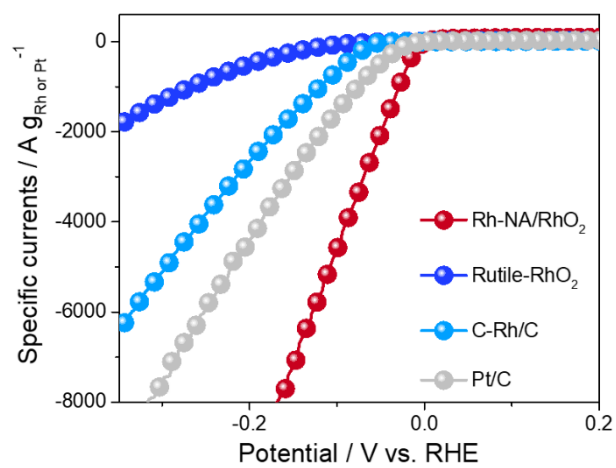

1

2 **Supplementary Figure 21. The comparison of specific currents for different catalysts.** The specific  
3 currents of Rh-NA/RhO<sub>2</sub>, Rutile-RhO<sub>2</sub>, C-Rh/C and Pt/C in 0.5 M H<sub>2</sub>SO<sub>4</sub>.

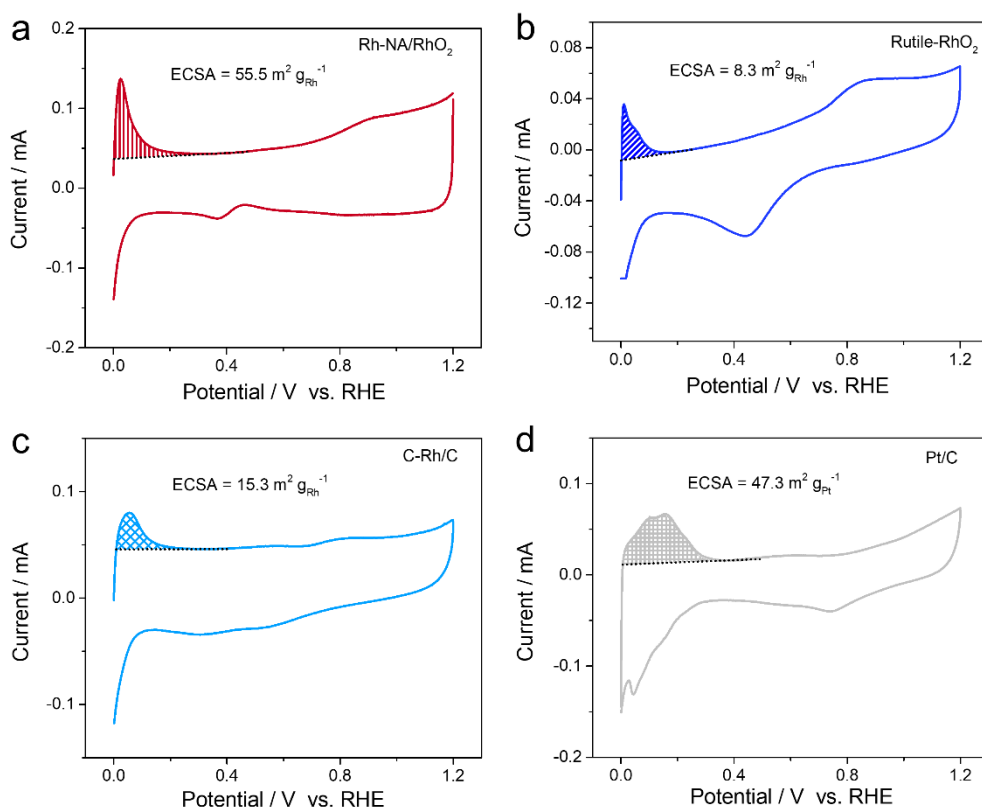

1  
2  
3  
4  
5

**Supplementary Figure 22. The calculations of ECSA for different catalysts. CV curves of (a) Rh-NA/RhO<sub>2</sub>, (b) Rutile-RhO<sub>2</sub>, (c) C-Rh/C and (d) Pt/C in H<sub>2</sub>-saturated 0.5 M H<sub>2</sub>SO<sub>4</sub> with a scan rate of 50 mV s<sup>-1</sup>.**



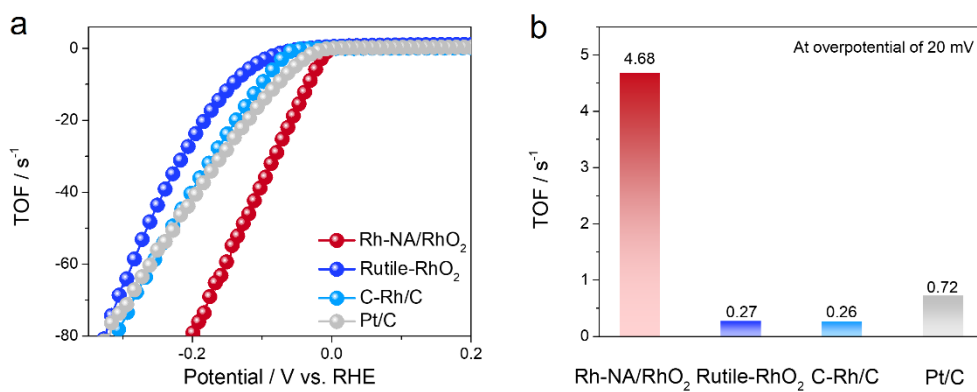

1

2 **Supplementary Figure 23. The calculations of TOFs for different catalysts. (a)** The comparison of  
 3 TOFs for Rh-NA/RhO<sub>2</sub>, Rutile-RhO<sub>2</sub>, C-Rh/C and Pt/C at different potentials (vs. RHE). **(b)** The TOFs of  
 4 Rh-NA/RhO<sub>2</sub>, Rutile-RhO<sub>2</sub>, C-Rh/C and Pt/C at the overpotential of 0.1 V.

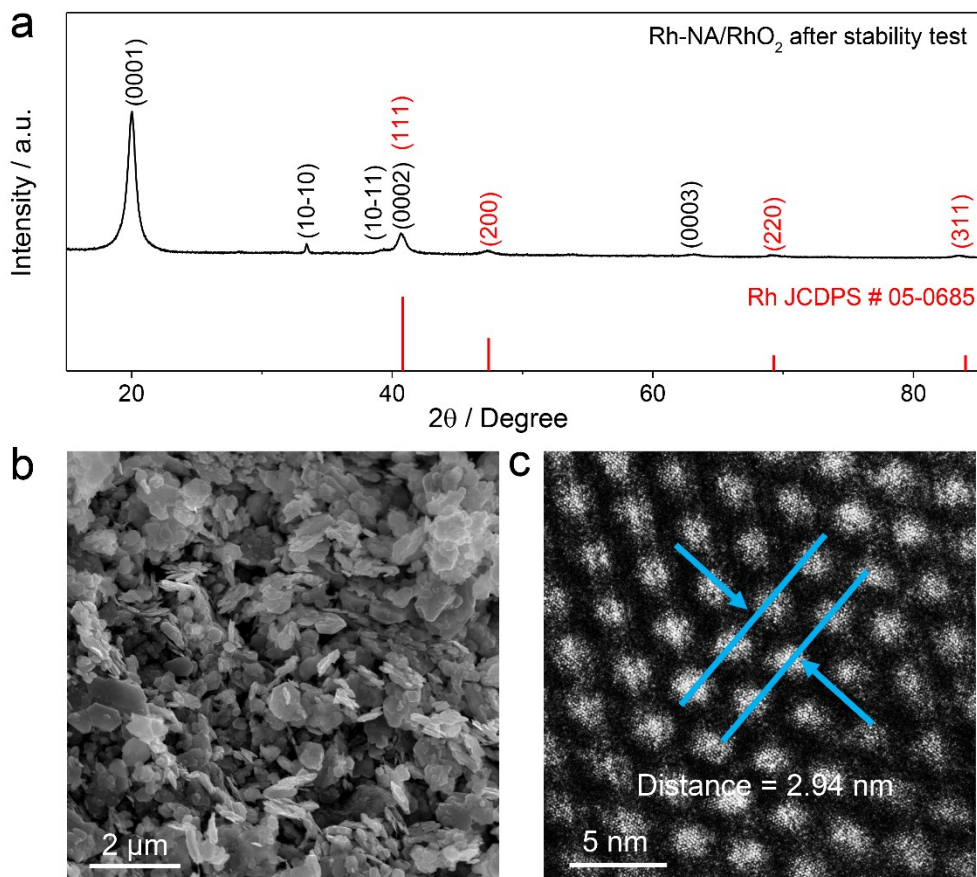

1  
 2 **Supplementary Figure 24. XRD pattern, SEM and STEM images of Rh-NA/RhO<sub>2</sub> after stability test.**  
 3 (a) The XRD pattern of Rh-NA/RhO<sub>2</sub> after long-term HER stability test, where the (111), (200), (220) and  
 4 (311) planes of face-centered cubic Rh was detected and marked in red. (b, c) SEM and STEM images of  
 5 Rh-NA/RhO<sub>2</sub> after long-term HER stability test.

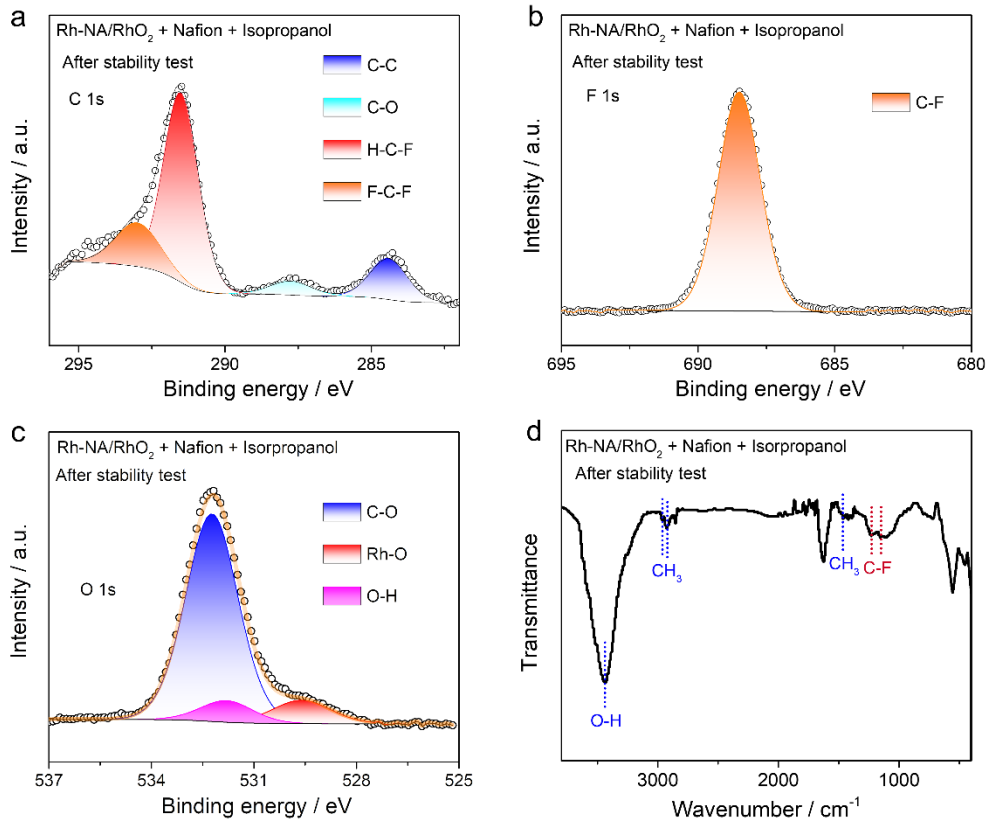

1

2

3

4

**Supplementary Figure 25. XPS and FTIR measurements of Rh-NA/RhO<sub>2</sub> after long-term HER stability test.** XPS spectra of (a) C 1s, (b) F 1s and (c) O 1s for Rh-NA/RhO<sub>2</sub> after long-term HER stability test. (d) FTIR spectrum of Rh-NA/RhO<sub>2</sub> after long-term HER stability test.

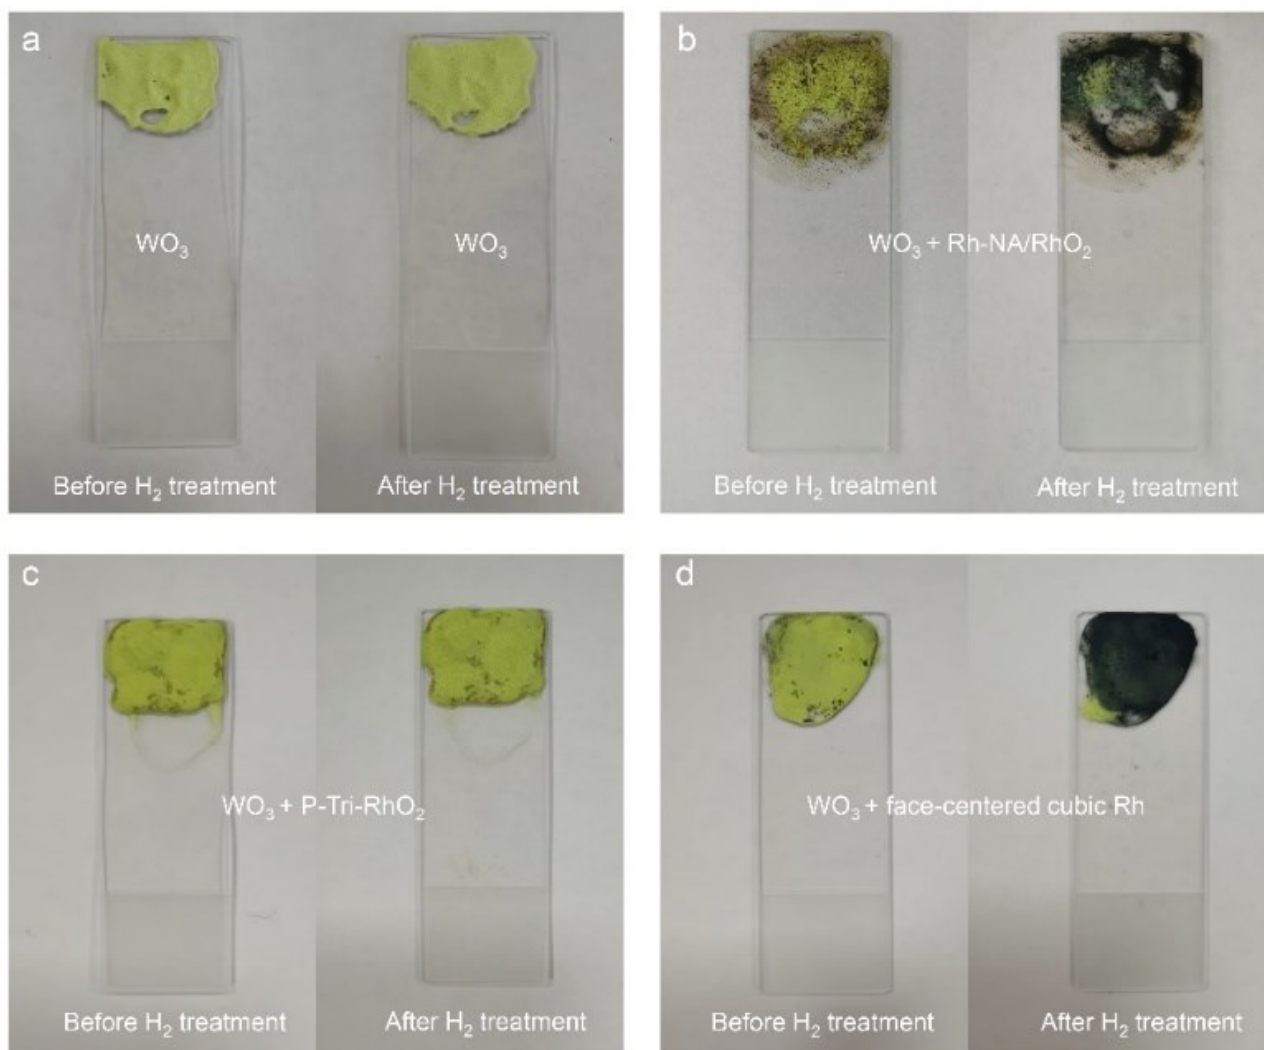

1

2 **Supplementary Figure 26. The measurements of hydrogen spillover for Rh-NA/RhO<sub>2</sub>.** (a) The  
 3 photographic image of WO<sub>3</sub> before and after H<sub>2</sub> treatment at room temperature. clearly showing no color  
 4 change after H<sub>2</sub> treatment. (b) The photographic image of physical mixture for Rh-NA/RhO<sub>2</sub> and WO<sub>3</sub>  
 5 before and after H<sub>2</sub> treatment at room temperature, clearly showing the color change of WO<sub>3</sub> from yellow  
 6 to dark blue after H<sub>2</sub> treatment. (c) The photographic image of physical mixture P-Tri-RhO<sub>2</sub> and WO<sub>3</sub>  
 7 before and after H<sub>2</sub> treatment at room temperature, clearly showing no color change after H<sub>2</sub> treatment. (d)  
 8 The photographic image of physical mixture Rh and WO<sub>3</sub> before and after H<sub>2</sub> treatment at room  
 9 temperature, clearly showing the color change of WO<sub>3</sub> from yellow to dark blue after H<sub>2</sub> treatment.

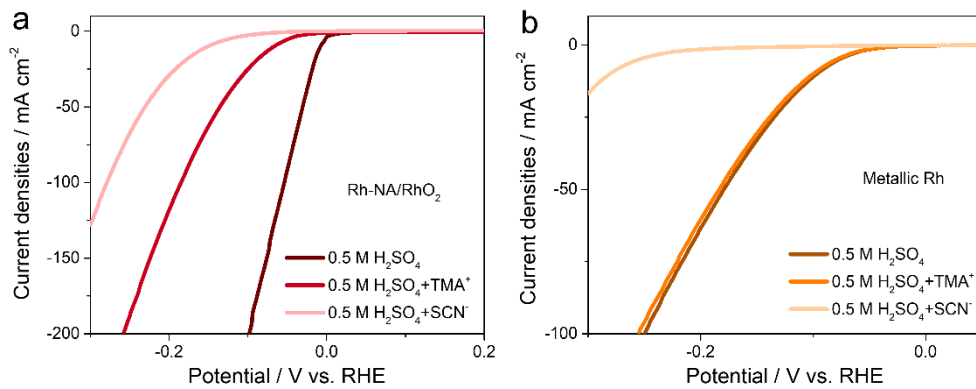

1  
 2 **Supplementary Figure 27. Poison experiment for Rh-NA/RhO<sub>2</sub>.** Polarization curves for (a)  
 3 Rh-NA/RhO<sub>2</sub> and (b) Rh before and after the addition of SCN<sup>-</sup> or TMA<sup>+</sup> ions in 0.5 M H<sub>2</sub>SO<sub>4</sub>.

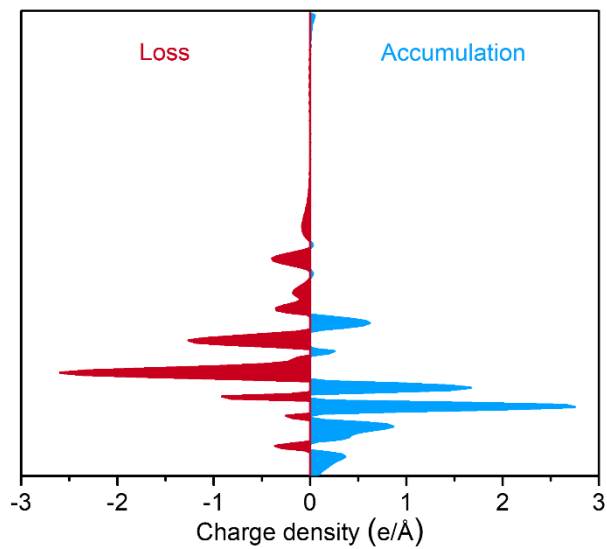

1  
2 **Supplementary Figure 28. Charge density difference of Rh-NA/RhO<sub>2</sub>.** Charge density difference of  
3 Rh-NA/RhO<sub>2</sub> along z direction.

1 **Supplementary Tables**2 **Supplementary Table 1. Crystallographic information for P-Tri-RhO<sub>2</sub> and Rutile-RhO<sub>2</sub>.**

| <b>Material</b>               | <b>Crystal system</b> | <b>Bravais lattice</b> | <b>Unit-cell dimensions</b>                                                       | <b>Space group</b>              |
|-------------------------------|-----------------------|------------------------|-----------------------------------------------------------------------------------|---------------------------------|
|                               |                       |                        | $a = b = 3.091 \pm 0.004 \text{ \AA}, c =$                                        |                                 |
| <b>P-Tri-RhO<sub>2</sub></b>  | <b>Trigonal</b>       | <b>Primitive</b>       | $4.407 \pm 0.004 \text{ \AA};$<br>$\alpha = \beta = 90^\circ, \gamma = 120^\circ$ | <b>P-3m1 (164)</b>              |
|                               |                       |                        | $a = b = 4.489 \text{ \AA},$                                                      |                                 |
| <b>Rutile-RhO<sub>2</sub></b> | <b>Tetragonal</b>     | <b>Primitive</b>       | $c = 3.090 \text{ \AA};$<br>$\alpha = \beta = \gamma = 90^\circ$                  | <b>P4<sub>2</sub>/mnm (136)</b> |

3



1 **Supplementary Table 2. The hydrogen underpotential deposition-based area and BET values of**  
2 **P-Tri-RhO<sub>2</sub>, Rh-NA/RhO<sub>2</sub>, Rutile-RhO<sub>2</sub>, C-Rh/C and Pt/C.**

| <b>Catalyst</b>               | <b>Hydrogen under potential<br/>deposition-based area / m<sup>2</sup> g<sup>-1</sup></b> | <b>BET area / m<sup>2</sup> g<sup>-1</sup></b> |
|-------------------------------|------------------------------------------------------------------------------------------|------------------------------------------------|
| <b>P-Tri-RhO<sub>2</sub></b>  | <b>8.8 ± 0.12</b>                                                                        | <b>30.3 ± 0.82</b>                             |
| <b>Rh-NA/RhO<sub>2</sub></b>  | <b>55.5 ± 1.13</b>                                                                       | <b>/</b>                                       |
| <b>Rutile-RhO<sub>2</sub></b> | <b>8.3 ± 0.2</b>                                                                         | <b>9.5 ± 0.25</b>                              |
| <b>C-Rh/C</b>                 | <b>15.3 ± 0.31</b>                                                                       | <b>147.1 ± 3.01</b>                            |
| <b>Pt/C</b>                   | <b>47.3 ± 1.01</b>                                                                       | <b>137.9 ± 2.82</b>                            |

3

1 **Supplementary Table 3. The SDs of Rh atoms for different Moire patterns and Rh-NA/RhO<sub>2</sub>.**

| <b>Structure</b>                                                                    | <b>The theoretical range of SD for different Moire patterns / nm<sup>-2</sup></b> | <b>The SDs for Rh-NA/RhO<sub>2</sub> / nm<sup>-2</sup></b> |
|-------------------------------------------------------------------------------------|-----------------------------------------------------------------------------------|------------------------------------------------------------|
| <b>Rh-NA/RhO<sub>2</sub></b>                                                        | /                                                                                 | <b>47.904 (theoretical) / 47.3±1.2 (actual)</b>            |
| Moire pattern with two layer of P-Tri-RhO <sub>2</sub>                              | 12.086~24.172                                                                     | /                                                          |
| Moire pattern with two layer of metallic Rh                                         | 15.969~31.938                                                                     | /                                                          |
| Moire pattern with one layer of P-Tri-RhO <sub>2</sub> and one layer of metallic Rh | 12.086~28.055                                                                     | /                                                          |

2

1 **Supplementary Table 4. The HER activities of Rh-NA/RhO<sub>2</sub>, Rutile-RhO<sub>2</sub>, C-Rh/C and Pt/C in 0.5**  
 2 **M H<sub>2</sub>SO<sub>4</sub>\*.**

| <b>Catalyst</b>               | <b>Overpotential @<br/>10 mA cm<sup>-2</sup> / mV</b> | <b>Geometric activity<br/>/ mA cm<sup>-2</sup></b> | <b>Mass activity /<br/>mA mg<sub>Rh or Pt</sub><sup>-1</sup></b> | <b>Tafel slope /<br/>mV dec<sup>-1</sup></b> |
|-------------------------------|-------------------------------------------------------|----------------------------------------------------|------------------------------------------------------------------|----------------------------------------------|
| <b>Rh-NA/RhO<sub>2</sub></b>  | <b>9.8 ± 0.61</b>                                     | <b>200 ± 4.0</b>                                   | <b>4634 ± 30.0</b>                                               | <b>24.0</b>                                  |
| <b>Rutile-RhO<sub>2</sub></b> | 148 ± 2.4                                             | 3 ± 0.1                                            | 67 ± 0.9                                                         | 99.1                                         |
| <b>C-Rh/C</b>                 | 83 ± 1.6                                              | 17 ± 0.2                                           | 601 ± 5.2                                                        | 43.7                                         |
| <b>Pt/C</b>                   | 29 ± 0.9                                              | 85 ± 1.8                                           | 1502 ± 12.8                                                      | 30.0                                         |

3 \*The geometric activity and mass activity were obtained at -0.1 V vs. RHE.

1 **Supplementary Table 5. The exchange current density ( $j_0$ ) of Rh-NA/RhO<sub>2</sub>, Rutile-RhO<sub>2</sub>, C-Rh/C**  
2 **and Pt/C in 0.5 M H<sub>2</sub>SO<sub>4</sub>.**

| <b>Catalysts</b>              | <b>Exchange current density / mA cm<sup>-2</sup></b> |
|-------------------------------|------------------------------------------------------|
| <b>Rh-NA/RhO<sub>2</sub></b>  | <b>-3.356 ± 0.1258</b>                               |
| <b>Rutile-RhO<sub>2</sub></b> | <b>-0.561 ± 0.0015</b>                               |
| <b>C-Rh/C</b>                 | <b>-0.142 ± 0.0003</b>                               |
| <b>Pt/C</b>                   | <b>-1.220 ± 0.0430</b>                               |

3

1 **Supplementary Table 6. The comparison of HER activity performances of Rh-NA/RhO<sub>2</sub> with**  
 2 **previous reported electrocatalysts.**

| Catalyst                                           | Substrate  | Electrolyte                              | Overpotential<br>@ 10 mA cm <sup>-2</sup><br>/ mV | Tafel<br>slope /<br>mV dec <sup>-1</sup> | Supplementary<br>References |
|----------------------------------------------------|------------|------------------------------------------|---------------------------------------------------|------------------------------------------|-----------------------------|
| <b>Rh-NA/RhO<sub>2</sub></b>                       | <b>GCE</b> | <b>0.5 M H<sub>2</sub>SO<sub>4</sub></b> | <b>9.8</b>                                        | <b>24.0</b>                              | <b>This work</b>            |
| <b>PdCoO<sub>2</sub></b>                           | GCE        | 1 M H <sub>2</sub> SO <sub>4</sub>       | 15                                                | 38                                       | 1                           |
| <b>Pt<sub>1</sub>/OLC</b>                          | GCE        | 0.5 M H <sub>2</sub> SO <sub>4</sub>     | 38                                                | 36                                       | 2                           |
| <b>Pt-GT-1</b>                                     | GCE        | 0.1 M HClO <sub>4</sub>                  | 18                                                | 24                                       | 3                           |
| <b>Pd<sub>3</sub>P<sub>2</sub>S<sub>8</sub></b>    | GCE        | 0.5 M H <sub>2</sub> SO <sub>4</sub>     | 91                                                | 29                                       | 4                           |
| <b>Ru@C<sub>2</sub>N</b>                           | GCE        | 0.5 M H <sub>2</sub> SO <sub>4</sub>     | 13.5                                              | 30                                       | 5                           |
| <b>Pt-SAs/TMDs</b>                                 | GCE        | 0.5 M H <sub>2</sub> SO <sub>4</sub>     | 32                                                | 28                                       | 6                           |
| <b>RuIr-NC</b>                                     | RDE        | 0.5 M H <sub>2</sub> SO <sub>4</sub>     | 46                                                | 32                                       | 7                           |
| <b>1%Pd-MoS<sub>2</sub>/CP</b>                     | GCE        | 0.5 M H <sub>2</sub> SO <sub>4</sub>     | 78                                                | 32                                       | 8                           |
| <b>Rh<sub>2</sub>P</b>                             | GCE        | 0.5 M H <sub>2</sub> SO <sub>4</sub>     | 14                                                | 31.7                                     | 9                           |
| <b>Rh NS/C</b>                                     | GCE        | 0.1 M HClO <sub>4</sub>                  | 15.8                                              | 61.5                                     | 10                          |
| <b>Au-Rh</b>                                       | RDE        | 0.5 M H <sub>2</sub> SO <sub>4</sub>     | 20                                                | 29                                       | 11                          |
| <b>Rh-MoS<sub>2</sub></b>                          | RDE        | 0.5 M H <sub>2</sub> SO <sub>4</sub>     | 67                                                | 54                                       | 12                          |
| <b>Rh<sub>2</sub>S<sub>3</sub>-<br/>ThickHNP/C</b> | GCE        | 0.5 M H <sub>2</sub> SO <sub>4</sub>     | 88                                                | 44                                       | 13                          |
| <b>a-RuTe<sub>2</sub> PNRs</b>                     | GCE        | 0.5 M H <sub>2</sub> SO <sub>4</sub>     | 33                                                | 35                                       | 14                          |
| <b>RuCu NPs</b>                                    | GCE        | 0.5 M H <sub>2</sub> SO <sub>4</sub>     | 19                                                | 26                                       | 15                          |
| <b>Pt-PVP/TNR@GC</b>                               | RDE        | 0.5 M H <sub>2</sub> SO <sub>4</sub>     | 21                                                | 27                                       | 16                          |
| <b>PdCu/Ir</b>                                     | GCE        | 0.1 M HClO <sub>4</sub>                  | 20                                                | 59.6                                     | 17                          |

|                               |     |                                      |      |      |    |
|-------------------------------|-----|--------------------------------------|------|------|----|
| <b>RuIrO<sub>x</sub></b>      | RDE | 0.5 M H <sub>2</sub> SO <sub>4</sub> | 12   | 23   | 18 |
| <b>Pt<sub>5</sub>/HMCS</b>    | RDE | 0.5 M H <sub>2</sub> SO <sub>4</sub> | 20.7 | 28.3 | 19 |
| <b>AL-Pt/Pd<sub>3</sub>Pb</b> | GCE | 0.5 M H <sub>2</sub> SO <sub>4</sub> | 13.8 | 18   | 20 |
| <b>Pt-AC/DG</b>               | GCE | 0.1 M HClO <sub>4</sub>              | 21   | 27.5 | 21 |

1

1 **Supplementary Table 7. The comparison of minimum cluster size and minimum interparticle**  
 2 **distance with previous reported materials.**

| <b>Materials</b>                                    | <b>Minimum cluster size</b> | <b>Minimum inter-particle distance</b> | <b>Minimum inter-surface distance</b> | <b>Preparation method</b>                                                                   | <b>Supplementary References</b> |
|-----------------------------------------------------|-----------------------------|----------------------------------------|---------------------------------------|---------------------------------------------------------------------------------------------|---------------------------------|
| <b>Rh-NA/RhO<sub>2</sub></b>                        | <b>3.2 nm</b>               | <b>3.709 nm</b>                        | <b>0.5 nm</b>                         | <b>In situ formed Rh nanoarrays on metastable trigonal phase RhO<sub>2</sub> nanosheets</b> | <b>This work</b>                |
| <b>As<sub>2</sub>Se<sub>3</sub>-PVDF core-shell</b> | ~200 nm                     | ~800 nm                                | ~1 μm                                 | Melting commercially bought glasses                                                         | 22                              |
| <b>Fe<sub>3</sub>O<sub>4</sub> NCA</b>              | ~8 nm                       | ~10.7 nm                               | ~3 nm                                 | Controlled thermal decomposition                                                            | 23                              |
| <b>SHNO arrays</b>                                  | 50 nm                       | 100 nm                                 | ~115 nm                               | Ultra-high vacuum magnetron sputtering machine                                              | 24                              |
| <b>3D gold nanostructures</b>                       | 5.8 nm                      | 7.1 nm                                 | ~3 nm                                 | Pressure-directed assembly (PDA)                                                            | 25                              |
| <b>Platinum nanoparticle array</b>                  | 40 nm                       | 150 nm                                 | ~100 nm                               | Electron beam lithography (EBL)                                                             | 26                              |
| <b>Au@Ag core-shell</b>                             | 17 nm                       | 45 nm                                  | ~30 nm                                | Block copolymer (BCP) lithography                                                           | 27                              |
| <b>Nanopattern apertures</b>                        | 12 nm                       | 100 nm                                 | 33 nm                                 | Focused-ion-beam-guided pre patterning technique                                            | 28                              |
| <b>AgNC array</b>                                   | 100 nm                      | 2000 nm                                | 1.8 μm                                | Directed assembly of silver nanocubes (AgNCs) onto TiO <sub>2</sub> coated Si substrates.   | 29                              |
| <b>Ag nanoparticle arrays</b>                       | 200 nm                      | 540 nm                                 | ~296 nm                               | Thermal evaporation and focused-ion beam                                                    | 30                              |
| <b>Pt nanoparticle (NP) arrays</b>                  | /                           | 57 nm                                  | ~25 nm                                | Electrochemical anodization process                                                         | 31                              |
| <b>Au<sub>0.5</sub>Pt<sub>0.5</sub> alloy</b>       | 6 nm                        | 20 nm                                  | ~26 nm                                | Block copolymer micellar nanoLithography (BCML)                                             | 32                              |
| <b>Si<sub>3</sub>N<sub>4</sub></b>                  | 15 nm                       | 100 nm                                 | ~73.5 nm                              | EUV interference lithography                                                                | 33                              |
| <b>Platinum</b>                                     | 28 nm                       | 100 nm                                 | ~100 nm                               | Electron beam                                                                               | 34                              |

| <b>nanoparticle array</b>                             | lithography (EBL) |          |          |                                         |    |
|-------------------------------------------------------|-------------------|----------|----------|-----------------------------------------|----|
| <b>Cu NPs arrays</b>                                  | 110 nm            | 350 nm   | ~206 nm  | Interfacial self-assembly               | 35 |
| <b>Fe<sub>2</sub>O<sub>3</sub> nanoparticle array</b> | 9.01 nm           | 19.23 nm | ~16.3 nm | Block copolymer lithography             | 36 |
| <b>Au nanoparticle arrays</b>                         | 2.4 nm            | 26.8 nm  | ~24.4 nm | Ar plasma treatment                     | 37 |
| <b>Pt nanoparticle arrays</b>                         | 2.2 nm            | 10.8 nm  | ~23.4 nm | PS-b-P2VP diblock-copolymers            | 38 |
| <b>Si<sub>0.5</sub>CeO<sub>0.5</sub></b>              | 5 nm              | 10 nm    | ~7 nm    | Co-self-assembling route                | 39 |
| <b>Au nanoparticles</b>                               | 5.8 nm            | 10.5 nm  | ~2.1 nm  | Asymmetric heating of a novel precursor | 40 |
| <b>Pt Nanoparticle Arrays</b>                         | 20 nm             | 150 nm   | ~135 nm  | Electron beam lithography (EBL)         | 41 |
| <b>Pt nanoparticle arrays</b>                         | 28 nm             | 100 nm   | ~162 nm  | Electron beam lithography (EBL)         | 42 |
| <b>Platinum cluster arrays</b>                        | 50 nm             | 200 nm   | ~73.7 nm | Electron beam lithography (EBL)         | 43 |

1



## 1 Supplementary Notes

### 2 Supplementary Note 1. The calculation of surface densities (SDs) of Rh atoms for different Moire 3 patterns and Rh-NA/RhO<sub>2</sub>.

#### 4 1. For Moire patterns consisting of two single-layer P-Tri-RhO<sub>2</sub>

5 For a single-layer P-Tri-RhO<sub>2</sub>, the surface density of Rh atom is:

$$SD = 1 \div \left( \frac{\sqrt{3}}{2} \times 0.3091^2 \text{ nm}^2 \right) = 12.086 \text{ nm}^{-2}$$

6 If Moire patterns were obtained by twisting two single-layer P-Tri-RhO<sub>2</sub> with different rotation angles, the  
7 maximum surface density was determined to be  $\leq 2 \times 12.086 = 24.172 \text{ nm}^{-2}$ . So the range of surface  
8 density for Moire patterns obtained by twisting bilayer P-Tri-RhO<sub>2</sub> was determined to be  $12.086 \text{ nm}^{-2} \leq$   
9  $SD \leq 24.172 \text{ nm}^{-2}$ .

#### 10 2. For Moire patterns consisting of two single-layer metallic Rh

11 For a single-layer metallic Rh, the surface density of Rh atom is:

$$SD = 1 \div \left( \frac{\sqrt{3}}{2} \times 0.2689^2 \text{ nm}^2 \right) = 15.969 \text{ nm}^{-2}$$

12 If Moire patterns were obtained by twisting two single-layer metallic Rh with different rotation angles, the  
13 maximum surface density was determined to be  $2 \times 15.969 = 31.938 \text{ nm}^{-2}$ . So the range of surface  
14 density for Moire patterns obtained by twisting bilayer face-centered cubic Rh was determined to be  
15  $15.969 \text{ nm}^{-2} \leq SD \leq 31.938 \text{ nm}^{-2}$ .

#### 16 3. For Moire patterns consisting of one single-layer P-Tri-RhO<sub>2</sub> and one single-layer metallic Rh

17 If Moire patterns were obtained by twisting one single layer P-Tri-RhO<sub>2</sub> and one single layer metallic Rh  
18 with different rotation angles, the maximum surface density was determined to be  $15.969 + 12.086 =$   
19  $28.055 \text{ nm}^{-2}$ . So the range of surface density for Moire patterns obtained by twisting P-Tri-RhO<sub>2</sub> and  
20 metallic Rh was determined to be  $12.086 \text{ nm}^{-2} \leq SD \leq 28.055 \text{ nm}^{-2}$ .

#### 21 4. For face-centered cubic Rh nanocrystal arrays

22 The theoretical surface density of rhodium atoms for face-centered cubic Rh along the [111] growth  
23 direction.

$$SD = 3 \div \left( \frac{\sqrt{3}}{2} \times 0.2689^2 \text{ nm}^2 \right) = 47.904 \text{ nm}^{-2}$$

#### 24 5. The actual SD of Rh atoms in Rh-NA/RhO<sub>2</sub> counted from the (scanning transmission electron 25 microscopy) STEM image (Fig. 2f)

26 As shown in Fig. 2f, the actual SD of Rh atoms in Rh-NA/RhO<sub>2</sub> is counted to be  $47.3 \pm 1.2 \text{ nm}^{-2}$ .

27

1 **Supplementary Note 2. Proposed H spillover assisted HER mechanism for Rh-NA/RhO<sub>2</sub>.**

2 Based on the simulation, a possible path is proposed to explain the electrocatalysis of Rh-NA/RhO<sub>2</sub>. HER  
3 may take place on any Rh nanoparticles by themselves and with the help of H spillover from Rh  
4 nanoparticle to contact interface between Rh nanoparticle and P-Tri-RhO<sub>2</sub> substrate.

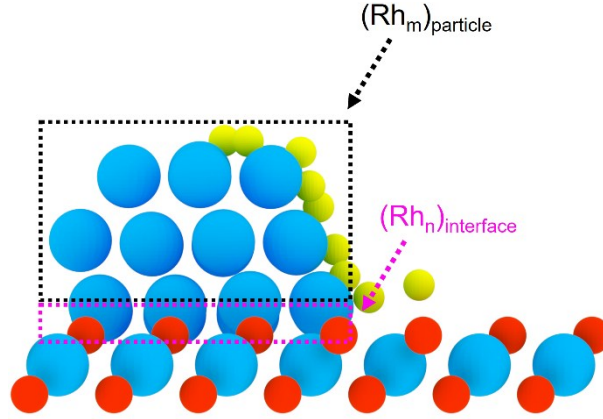

5  
6 Assuming that H spillover is from Rh nanoparticle  $(Rh_m)_{particle}$  to contact interface  $(Rh_n)_{interface}$ ,

7 the first step is the adsorption of H atom on the surface of Rh nanoparticle  $(Rh_m)_{particle}$ ,

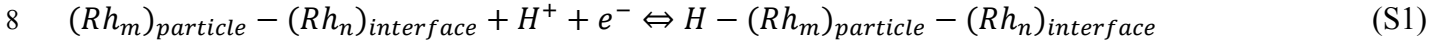

9 Secondly, the spillover of H atom from  $(Rh_m)_{particle}$  to  $(Rh_n)_{interface}$ ,

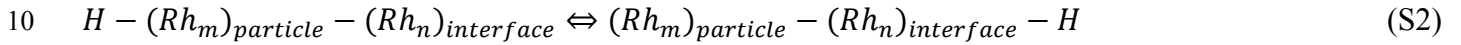

11 Thirdly, the Heyrovsky process on the interface of Rh nanoparticle and P-Tri-RhO<sub>2</sub>  $(Rh_n)_{interface}$ ,

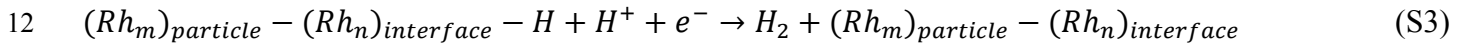

13 The kinetics may be complicated. The reaction velocity of hydrogen evolution may be written as

14  $r = k_3 \theta_{(Rh_n)_{interface}-H} C_{H^+}$ , where  $r$  is the reaction rate;  $k$  the rate constant;  $\theta$  the fractional  
15 occupancy of the H-adsorption sites; and  $C_{H^+}$  the concentration of hydrogen ion.

16 In the steady state, for  $\theta_{(Rh_n)_{interface}-H}$ ,

17 
$$\frac{d\theta_{(Rh_n)_{interface}-H}}{dt} =$$

18 
$$k_2 \theta_{(Rh_m)_{particle}-H} (1 - \theta_{(Rh_n)_{interface}-H}) - k_{-2} \theta_{(Rh_n)_{interface}-H} (1 - \theta_{(Rh_m)_{particle}-H}) -$$

19 
$$k_3 \theta_{(Rh_n)_{interface}-H} C_{H^+};$$

20 and for  $\theta_{(Rh_m)_{particle}-H}$

$$\begin{aligned}
1 \quad & \frac{d\theta_{(Rh_m)particle-H}}{dt} = k_1(1 - \theta_{(Rh_m)particle-H})C_{H^+} - k_{-1}\theta_{(Rh_m)particle-H} - k_2\theta_{(Rh_m)particle-H}(1 - \\
2 \quad & \theta_{(Rh_n)interface-H}) + k_{-2}\theta_{(Rh_n)interface-H}(1 - \theta_{(Rh_m)particle-H}).
\end{aligned}$$

3 At low overpotential,

$$\begin{aligned}
\theta_{(Rh_n)interface-H} &\approx \frac{k_2\theta_{(Rh_m)particle-H}}{k_2\theta_{(Rh_m)particle-H} + k_{-2} - k_{-2}\theta_{(Rh_m)particle-H} + k_3C_{H^+}} \\
&\approx \frac{k_{20}}{k_{-20}}\theta_{(Rh_m)particle-H}e^{-\frac{F\Delta\phi}{RT}} \\
\theta_{(Rh_m)particle-H} &\approx \frac{k_1C_{H^+} + k_{-2}\theta_{(Rh_n)interface-H}}{k_1C_{H^+} + k_{-1} + k_2 + k_{-2}\theta_{(Rh_n)interface-H} - k_2\theta_{(Rh_n)interface-H}} \approx \frac{k_{10}}{k_{-10}}C_{H^+}e^{-\frac{F\Delta\phi}{RT}}
\end{aligned}$$

$$4 \quad \text{Then, } r = k_3\theta_{(Rh_n)interface-H}C_{H^+} = \frac{k_{10}k_{20}k_{30}}{k_{-10}k_{-20}}C_{H^+}^2e^{-\frac{(2+\alpha)F\Delta\phi}{RT}} \quad (S4)$$

$$5 \quad \text{And } -j = Fr = \frac{k_{10}k_{20}k_{30}}{k_{-10}k_{-20}}FC_{H^+}^2e^{-\frac{(2+\alpha)F\Delta\phi}{RT}}$$

$$6 \quad \lg(-j) = Const + 2 \lg C_{H^+} - \frac{(2+\alpha)F}{2.303RT} \Delta\phi \quad (S5)$$

7 Therefore, the Tafel slope is:  $\frac{2.303RT}{(2+\alpha)F} = 0.024 \text{ V dec}^{-1}$  (assuming  $\alpha = 0.5$ ).

8

## 1 **Supplementary References**

- 2 1. Podjaski, F. et al. Rational strain engineering in delafossite oxides for highly efficient hydrogen  
3 evolution catalysis in acidic media. *Nat. Catal.* **3**, 55-63 (2020).
- 4 2. Li, D. B. et al. Atomically dispersed platinum supported on curved carbon supports for efficient  
5 electrocatalytic hydrogen evolution. *Nat. Energy* **4**, 512-518 (2019).
- 6 3. Tiwari, J. N. et al. Multicomponent electrocatalyst with ultralow Pt loading and high hydrogen  
7 evolution activity. *Nat. Energy* **3**, 773-782 (2018).
- 8 4. Zhang, X. et al. Lithiation-induced amorphization of Pd<sub>3</sub>P<sub>2</sub>S<sub>8</sub> for highly efficient hydrogen evolution.  
9 *Nat. Catal.* **1**, 460-468 (2018).
- 10 5. Mahmood, J. et al. An efficient and pH-universal ruthenium-based catalyst for the hydrogen evolution  
11 reaction. *Nat. Nanotechnol.* **12**, 441-446 (2017).
- 12 6. Shi, Y. et al. Electronic metal-support interaction modulates single-atom platinum catalysis for  
13 hydrogen evolution reaction. *Nat. Commun.* **12**, 3021 (2021).
- 14 7. Wu, D. S. et al. Efficient overall water splitting in acid with anisotropic metal nanosheets. *Nat.*  
15 *Commun.* **12**, 1145 (2021).
- 16 8. Luo, Z. Y. et al. Chemically activating MoS<sub>2</sub> via spontaneous atomic palladium interfacial doping  
17 towards efficient hydrogen evolution. *Nat. Commun.* **9**, 2120 (2018).
- 18 9. Yang, F. L. et al. A monodisperse Rh<sub>2</sub>P-based electrocatalyst for highly efficient and pH-universal  
19 hydrogen evolution reaction. *Adv. Energy Mater.* **8**, 1703489 (2018).
- 20 10. Wang, K. et al. Wrinkled Rh<sub>2</sub>P nanosheets as superior pH-Universal electrocatalysts for hydrogen  
21 evolution catalysis. *Adv. Energy Mater.* **8**, 1801891 (2018).
- 22 11. Du, R. et al. Engineering multimetallic aerogels for pH-universal HER and ORR electrocatalysis. *Adv.*  
23 *Energy Mater.* **10**, 1903857 (2020).

- 1 12. Meng, X. Y. et al. Distance synergy of MoS<sub>2</sub>-confined rhodium atoms for highly efficient hydrogen  
2 evolution. *Angew. Chem. Int. Ed.* **59**, 10502-10507 (2020).
- 3 13. Yoon, D. et al. Facet-controlled hollow Rh<sub>2</sub>S<sub>3</sub> hexagonal nanoprisms as highly active and structurally  
4 robust catalysts toward hydrogen evolution reaction. *Energy Environ. Sci.* **9**, 850-856 (2016).
- 5 14. Wang, J. et al. Amorphization activated ruthenium-tellurium nanorods for efficient water splitting. *Nat.*  
6 *Commun.* **10**, 5692 (2019).
- 7 15. Yao, Q. et al. Channel-rich RuCu nanosheets for pH-universal overall water splitting electrocatalysis.  
8 *Angew. Chem. Int. Ed.* **58**, 13983-13988 (2019).
- 9 16. Li, C. et al. Polyvinylpyrrolidone-coordinated single-site platinum catalyst exhibits high activity for  
10 hydrogen evolution reaction. *Angew. Chem. Int. Ed.* **59**, 15902-15907 (2020).
- 11 17. Li, M. G. et al. Exclusive strain effect boosts overall water splitting in PdCu/Ir core/shell nanocrystals.  
12 *Angew. Chem. Int. Ed.* **60**, 8243-8250 (2021).
- 13 18. Zhuang, Z. W. et al. Three-dimensional open nano-netcage electrocatalysts for efficient pH-universal  
14 overall water splitting. *Nat. Commun.* **10**, 4875 (2019).
- 15 19. Wan, X. K., Wu, H. B., Guan, B. Y., Luan, D. Y. & Lou, X. W. Confining sub-nanometer Pt clusters  
16 in hollow mesoporous carbon spheres for boosting hydrogen evolution activity. *Adv. Mater.* **32**,  
17 1901349 (2019).
- 18 20. Yao, Y. C. et al. Engineering the electronic structure of submonolayer Pt on intermetallic Pd<sub>3</sub>Pb via  
19 charge transfer boosts the hydrogen evolution reaction. *J. Am. Chem. Soc.* **141**, 19964-19968 (2019).
- 20 21. Chen, Q. Q. et al. Carbon-defect-driven electroless deposition of Pt atomic clusters for highly efficient  
21 hydrogen evolution. *J. Am. Chem. Soc.* **142**, 5594-5601 (2020).
- 22 22. Yaman, M. et al. Arrays of indefinitely long uniform nanowires and nanotubes. *Nat. Mater.* **10**,  
23 494-501 (2011).

- 1 23. Ong, W. L., Rupich, S. M., Talapin, D. V., McGaughey, A. J. H. & Malen, J. A. Surface chemistry  
2 mediates thermal transport in three-dimensional nanocrystal arrays. *Nat. Mater.* **12**, 410-415 (2013).
- 3 24. Zahedinejad, M. et al. Two-dimensional mutually synchronized spin Hall nano-oscillator arrays for  
4 neuromorphic computing. *Nat. Nanotechnol.* **15**, 47-52 (2019).
- 5 25. Wu, H. et al. Nanostructured gold architectures formed through high pressure-driven sintering of  
6 spherical nanoparticle arrays. *J. Am. Chem. Soc.* **132**, 12826-12828 (2010).
- 7 26. Baldelli, S., Eppler, A. S., Anderson, E., Shen, Y. R. & Somorjai, G. A. Surface enhanced sum  
8 frequency generation of carbon monoxide adsorbed on platinum nanoparticle arrays. *J. Chem. Phys.*  
9 **113**, 5432-5438 (2000).
- 10 27. Cha, S. K. et al. Au-Ag core-shell nanoparticle array by block copolymer lithography for synergistic  
11 broadband plasmonic properties. *ACS Nano* **9**, 5536-5543 (2015).
- 12 28. Lin, M. N. et al. Fabrication of an ordered nanoparticle array with a nanoaperture membrane used as a  
13 contact-mask. *Nanotechnology* **17**, 315-319 (2006).
- 14 29. Speckbacher, M. et al. Directed assembly of nanoparticle threshold-selector arrays. *Adv. Electron.*  
15 *Mater.* **5**, 1900098 (2019).
- 16 30. Huang, X. D., Lou, C. G. & Zhang, H. Experimentally demonstrating plasmonic lattice mode in  
17 periodic Ag nanoparticle arrays on quartz trapezoidal pillars. *J. Phys. D Appl. Phys.* **51**, 465101  
18 (2018).
- 19 31. Owusu-Ansah, E., Horwood, C. A., El-Sayed, H. A., Birss, V. I. & Shi, Y. J. J. A method for the  
20 formation of Pt metal nanoparticle arrays using nanosecond pulsed laser dewetting. *Appl. Phys. Lett.*  
21 **106**, 203103 (2015).
- 22 32. Jahn, S., Lechner, S. J., Freichels, H., Moller, M. & Spatz, J. P. Precise Au<sub>x</sub>Pt<sub>1-x</sub> alloy nanoparticle  
23 array of tunable composition for catalytic applications. *Sci. Rep.* **6**, 20536 (2016).

- 1 33. Karim, W. et al. High-resolution and large-area nanoparticle arrays using EUV interference lithography.  
2 *Nanoscale* **7**, 7386-7393 (2015).
- 3 34. Zhu, J. & Somorjai, G. A. Formation of platinum silicide on a platinum nanoparticle array model  
4 catalyst deposited on silica during chemical reaction. *Nano Lett.* **1**, 8-13 (2001).
- 5 35. Hang, L. F. et al. Copper nanoparticle@graphene composite arrays and their enhanced catalytic  
6 performance. *Acta Mater.* **105**, 59-67 (2016).
- 7 36. Shi, D. O. et al. Sub-nanometer level size tuning of a monodisperse nanoparticle array via block  
8 copolymer lithography. *Adv. Funct. Mater.* **21**, 250-254 (2011).
- 9 37. Kumar, S. & Zou, S. Z. Electrooxidation of CO on uniform arrays of Au nanoparticles: effects of  
10 particle size and interparticle spacing. *Langmuir* **25**, 574-581 (2009).
- 11 38. Yang, H. Z., Kumar, S. & Zou, S. Z. Electroreduction of O<sub>2</sub> on uniform arrays of Pt nanoparticles. *J.*  
12 *Electroanal. Chem.* **688**, 180-188 (2013).
- 13 39. Chane-Ching, J. Y. et al. Surface characterization and properties of ordered arrays of CeO<sub>2</sub>  
14 nanoparticles embedded in thin layers of SiO<sub>2</sub>. *Langmuir* **21**, 1568-1574 (2005).
- 15 40. Egusa, S. Redmond, P. L. & Scherer, N. F. Thermally-driven nanoparticle array growth from atomic  
16 Au precursor solutions. *J. Phys. Chem. C* **111**, 17993-17996 (2007).
- 17 41. Eppler, A. S., Rupprechter, G., Anderson, E. A. & Somorjai, G. A. Thermal and chemical stability and  
18 adhesion strength of Pt nanoparticle arrays supported on silica studied by transmission electron  
19 microscopy and atomic force microscopy. *J. Phys. Chem. B* **104**, 7286-7292 (2000).
- 20 42. Eppler, A. S., Zhu, J., Anderson, E. A. & Somorjai, G. A. Model catalysts fabricated by electron beam  
21 lithography: AFM and TPD surface studies and hydrogenation/dehydrogenation of cyclohexene plus  
22 H<sub>2</sub> on a Pt nanoparticle array supported by silica. *Top. Catal.* **13**, 33-41 (2000).
- 23 43. Jacobs, P. W., Ribeiro, F. H., Somorjai, G. A. & Wind, S. J. New model catalysts: Uniform platinum

1 cluster arrays produced by electron beam lithography. *Catal. Lett.* **37**, 131-136 (1996).
