# Supplementary material for: Coupling of nanocrystal hexagonal array and two-dimensional metastable substrate boosts H2-production
Source: PubMed Central journal article supplement (PMC9530234; doi:10.1038/s41467-022-33512-5), 2022-10-03
Supplement: 41467_2022_33512_MOESM3_ESM.pdf [file 41467_2022_33512_MOESM3_ESM.pdf]

## **Description of Additional Supplementary Files**

File Name: Supplementary Movie 1

Description: The movie of the simulated Morie pattern by twisting bilayer P-Tri-RhO<sub>2</sub>.
